# Supplementary material for: CCN2 Aggravates the Immediate Oxidative Stress–DNA Damage Response following Renal Ischemia–Reperfusion Injury
Source: MDPI journal article supplement (doi:10.3390/antiox10122020), 2021-12-20
Supplement: s1 [file s1]

**Table S3.** Differentially expressed genes with the largest fold down- or upregulation in the pairwise comparison between CCN2 KO IRI mice and WT IRI mice.

| Gene     | Full gene name                                             | log2 FC § | lfcSE | p value & |
|----------|------------------------------------------------------------|-----------|-------|-----------|
| Rap2b*   | RAP2B (member of RAS oncogene family)                      | 2,106     | 0,238 | 0,000     |
| Frat2*   | FRAT regulator of WNT signaling pathway 2                  | 1,902     | 0,297 | 0,000     |
| Ier2*    | immediate early response 2                                 | 1,780     | 0,209 | 0,000     |
| Cxcl1    | C-X-C motif chemokine ligand 1                             | 1,718     | 0,306 | 0,000     |
| Cebpb    | CCAAT enhancer binding protein beta                        | 1,686     | 0,215 | 0,000     |
| Cxcl10   | C-X-C motif chemokine ligand 10                            | 1,667     | 0,200 | 0,000     |
| Kif23    | kinesin family member 23                                   | 1,660     | 0,237 | 0,000     |
| Csrnp1   | cysteine and serine rich nuclear protein 1                 | 1,505     | 0,227 | 0,000     |
| Vgf      | VGF nerve growth factor inducible                          | 1,486     | 0,313 | 0,000     |
| Maff     | MAF bZIP transcription factor F                            | 1,484     | 0,307 | 0,000     |
| Junb     | jun B proto-oncogene                                       | 1,482     | 0,186 | 0,000     |
| Btg1     | BTG anti-proliferation factor 1                            | 1,478     | 0,190 | 0,000     |
| Pde10a   | phosphodiesterase 10A                                      | 1,449     | 0,268 | 0,000     |
| Ppp1r15a | protein phosphatase 1 regulatory subunit 15A               | 1,427     | 0,279 | 0,000     |
| Btg2     | BTG anti-proliferation factor 2                            | 1,376     | 0,210 | 0,000     |
| Klhd7a   | kelch domain containing 7A                                 | -1,681    | 0,212 | 0,000     |
| Frlt1    | fibronectin leucine rich transmembrane protein 1           | -1,665    | 0,231 | 0,000     |
| Fads6    | fatty acid desaturase 6                                    | -1,644    | 0,227 | 0,000     |
| Il22ra1  | interleukin 22 receptor subunit alpha 1                    | -1,612    | 0,313 | 0,000     |
| Ccnd1    | cyclin D1                                                  | -1,526    | 0,182 | 0,000     |
| Prox1    | prospero homeobox 1                                        | -1,500    | 0,303 | 0,000     |
| Gpam     | glycerol-3-phosphate acyltransferase (mitochondrial)       | -1,485    | 0,159 | 0,000     |
| Tmem88b  | transmembrane protein 88B                                  | -1,482    | 0,246 | 0,000     |
| Adamts15 | ADAM metalloproteinase with thrombospondin type 1 motif 15 | -1,468    | 0,248 | 0,000     |
| Syt17    | synaptotagmin 17                                           | -1,462    | 0,251 | 0,000     |
| Cyp2u1   | cytochrome P450 family 2 subfamily U member 1              | -1,455    | 0,279 | 0,000     |
| Bsnd     | barttin CLCNK type accessory beta subunit                  | -1,449    | 0,186 | 0,000     |
| Fam78a   | family with sequence similarity 78 member A                | -1,447    | 0,272 | 0,000     |
| Cyp26b1  | cytochrome P450 family 26 subfamily B member 1             | -1,408    | 0,299 | 0,000     |
| Tnrc18   | trinucleotide repeat containing 18                         | -1,399    | 0,210 | 0,000     |

§ Positive Log2 fold change values represent lower expression in CCN2 KO IRI vs WT IRI; Negative Log2 fold change values represent higher expression in CCN2 KO IRI vs WT IRI

& False discovery rate adjusted p-values

Abbreviations: CCN2 = cellular communication network factor 2; KO = knockout; IRI = ischemia-reperfusion injury; WT = wild type; FC = fold change; SE = standard error
