# Supplementary material for: CCN2 Aggravates the Immediate Oxidative Stress–DNA Damage Response following Renal Ischemia–Reperfusion Injury
Source: MDPI journal article supplement (doi:10.3390/antiox10122020), 2021-12-20
Supplement: s1 [file s1]

**Table S1.** Primers used for real-time polymerase chain reaction

| <b>Gene</b>    | <b>SYBR Green primer sequence or<br/>Taqman Gene Expression Assay</b> | <b>accession</b> | <b>amplicon<br/>size</b> |
|----------------|-----------------------------------------------------------------------|------------------|--------------------------|
| <i>HMOX1</i>   | Fwd: AGGGTCAGGTGTCCAGAGAA<br>Rev: CTTCCAGGGCCGTGTAGATA                | NM_010442.2      | 72                       |
| <i>NQO1</i>    | Fwd: AGCGTTCGGTATTACGATCC<br>Rev: AGTACAATCAGGGCTCTTCTCG              | NM_008706.5      | 68                       |
| <i>GCLC</i>    | Fwd: AGATGATAGAACACGGGAGGAG<br>Rev: TGATCCTAAAGCGATTGTTCTTC           | NM_010295.2      | 62                       |
| <i>GCLM</i>    | Fwd: TGA CTCACAATGACCCGAAA<br>Rev: TCAATGTCAGGGATGCTTTCT              | NM_008129.4      | 79                       |
| <i>HMGB1A</i>  | Fwd: TGGGCGACTCTGTGCCTC<br>Rev: GCCTCTCGGCTTTTTAGGATC                 | NM_010439.4      | 72                       |
| <i>TBP</i>     | Mm00446971_m1                                                         | NM_013684.3      | 93                       |
| <i>CCN2</i>    | Mm01192932_g1                                                         | NM_010217.2      | 61                       |
| <i>KIM1</i>    | Mm00506686_m1                                                         | NM_134248.2      | 94                       |
| <i>NGAL</i>    | Mm01324470_m1                                                         | NM_008491.1      | 84                       |
| <i>SOX9</i>    | Mm00448840_m1                                                         | NM_011448.4      | 101                      |
| <i>CDKN1A</i>  | Mm00432448_m1                                                         | NM_007669.4      | 96                       |
| <i>GADD45A</i> | Mm00432802_m1                                                         | NM_007836.1      | 59                       |

Fwd = forward primer; Rev = reverse primer.
